# Supplementary material
Source: publisher figshare collection journal article supplement (https://acs.figshare.com/ndownloader/files/8475713)
Supplement: Supplementary file 1 [file 8475713]

## Supporting Information

### Laser-Induced Graphene Layers and Electrodes Prevents Microbial Fouling and Exerts Antimicrobial Action

Swatantra P. Singh<sup>1</sup>, Yilun Li<sup>2</sup>, Avraham Be'er<sup>1</sup>, Yoram Oren<sup>1</sup>, James M. Tour<sup>2\*</sup> and Christopher J. Arnusch<sup>1\*</sup>

<sup>1</sup>*Department of Desalination and Water Treatment, Zuckerberg Institute for Water Research, The Jacob Blaustein Institutes for Desert Research, Ben-Gurion University of the Negev, Sede-Boqer Campus 84990, Israel*

<sup>2</sup>*Department of Chemistry, Department of Materials Science and NanoEngineering, Smalley-Curl Institute and NanoCarbon Center, Rice University, 6100 Main Street, Houston, Texas 77005, USA.*

**\*Corresponding author:** C. J. Arnusch, [arnusch@bgu.ac.il](mailto:arnusch@bgu.ac.il) and J M. Tour, [tour@rice.edu](mailto:tour@rice.edu)

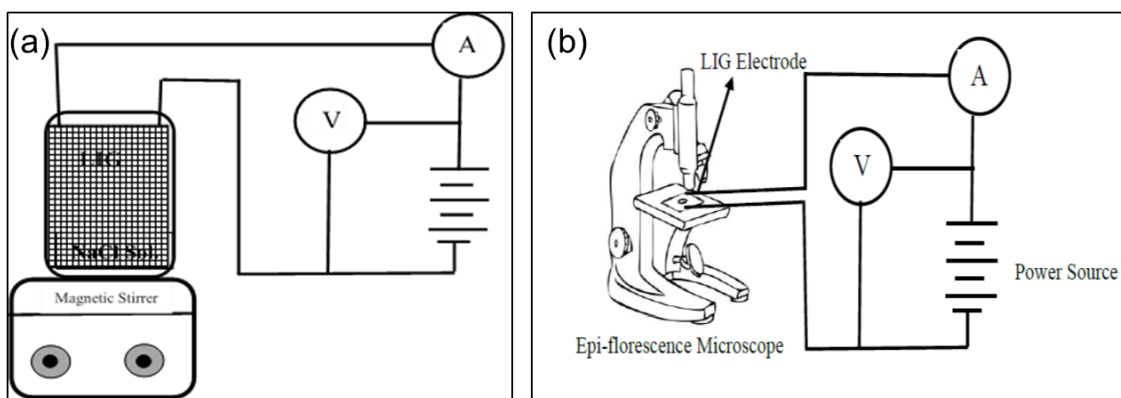

**Figure S1:** Antibacterial experiment with the LIG electrodes at different voltages (1.5, 2.0, 2.5 V). (a) Batch system; (b) Real time monitoring experiment under a microscope.

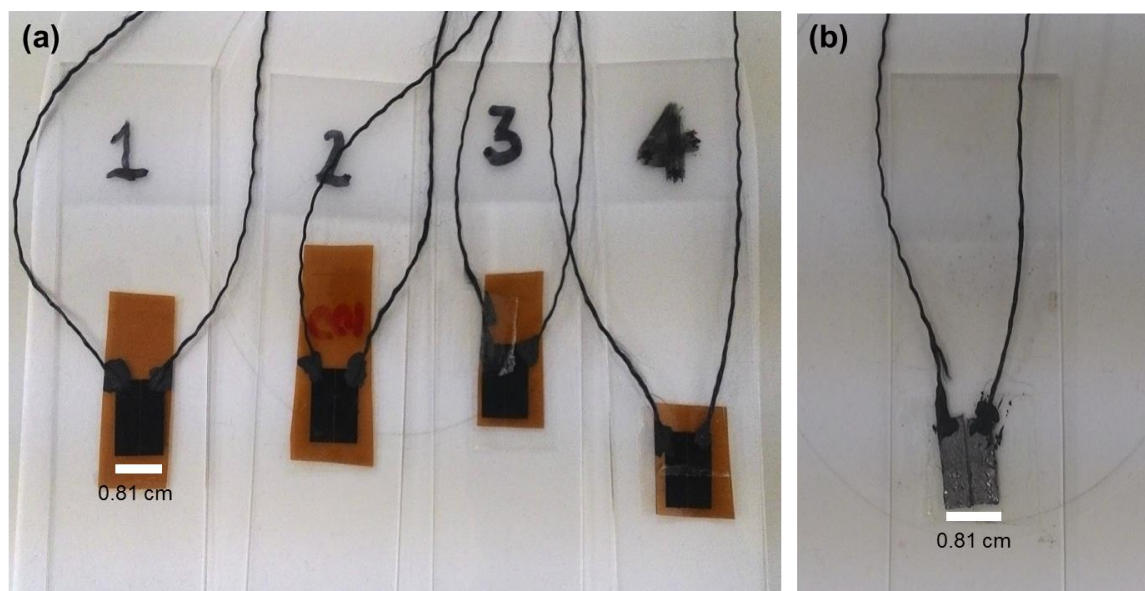

**Figure S2:** Electrodes for the real time monitoring of the *Pseudomonas aeruginosa* using epi-fluorescence microscopy; (a) LIG electrodes; (b) graphite paper electrode.

### X-Ray Diffraction of the LIG:

The crystalline sizes of LIG along  $c$  axis ( $L_c$ ) and domain size in the  $a$  axis ( $L_a$ ) were calculated by using Equation 1 and Equation 2, respectively.

$$L_c = \frac{0.89 \lambda}{B_{1/2} (2\theta) \cos \theta} \quad (1)$$

$$L_a = \frac{1.84 \lambda}{B_{1/2} (2\theta) \cos \theta} \quad (2)$$

Where  $B_{1/2} (2\theta)$  (in radian unit) is the full width and half maximum of peaks, and  $\lambda$  is X-ray wavelength ( $\lambda=1.54\text{\AA}$ ).  $L_c$  and  $L_a$  are calculated to be 1.8 and 5.8 nm, respectively.

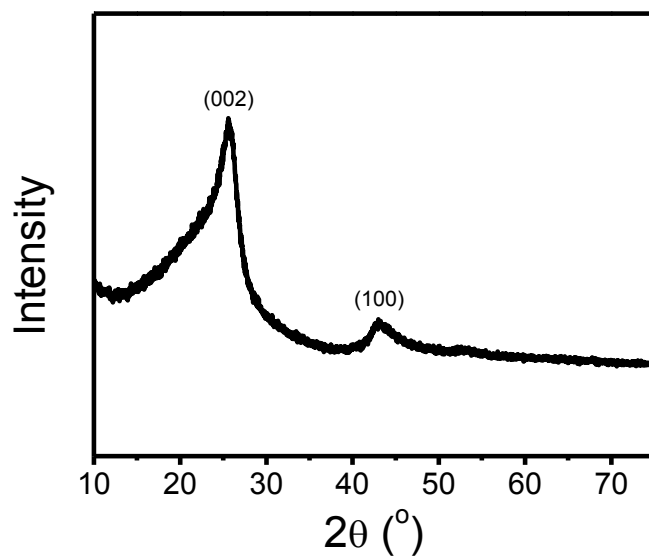

**Figure S3:** XRD of the powder LIG.

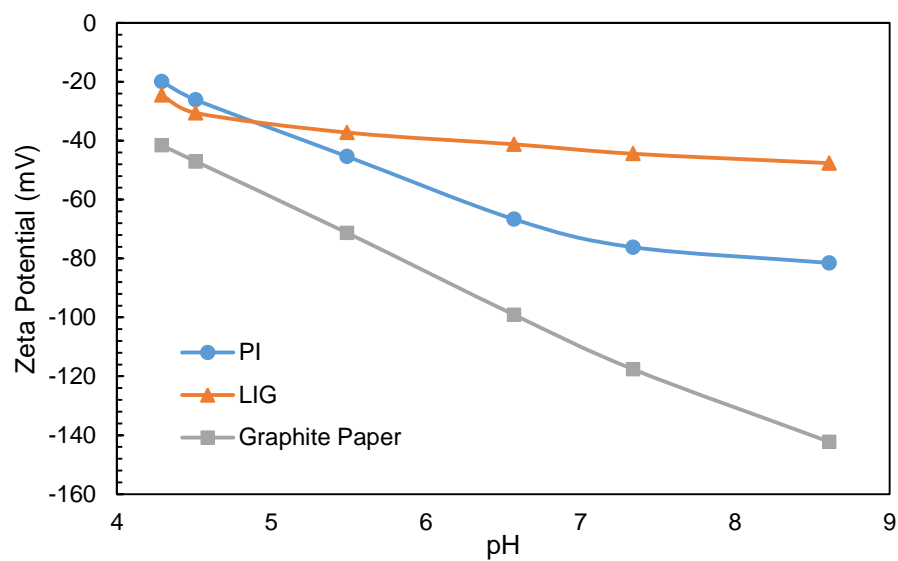

**Figure S4:** Zeta potential of different surfaces at different pH.

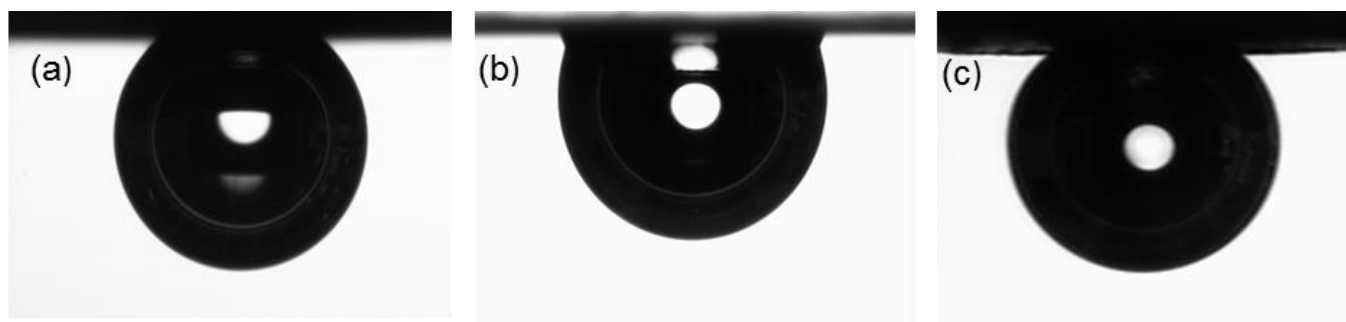

**Figure S5:** Contact angles for the (a) LIG film on PI , (b) PI, and (c) graphite paper are measured to be  $45.3 \pm 3.8^\circ$ ,  $74.5 \pm 3.3^\circ$  and  $61.3 \pm 6.6^\circ$ , respectively.

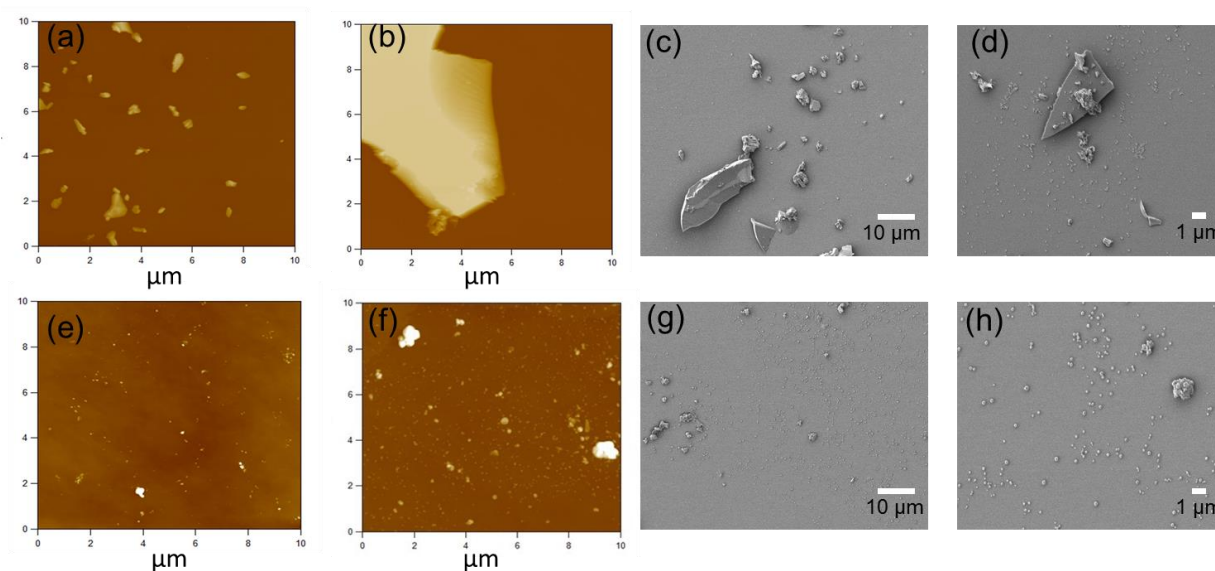

**Figure S6:** Atomic force microscopy (AFM) and scanning electron microscopy (SEM) images for powder LIG; (a & b) AFM images for P-LIG-B; (c & d) SEM images for P-LIG-B; (e & f) AFM images for P-LIG-S; (g & h) SEM images for P-LIG-S.

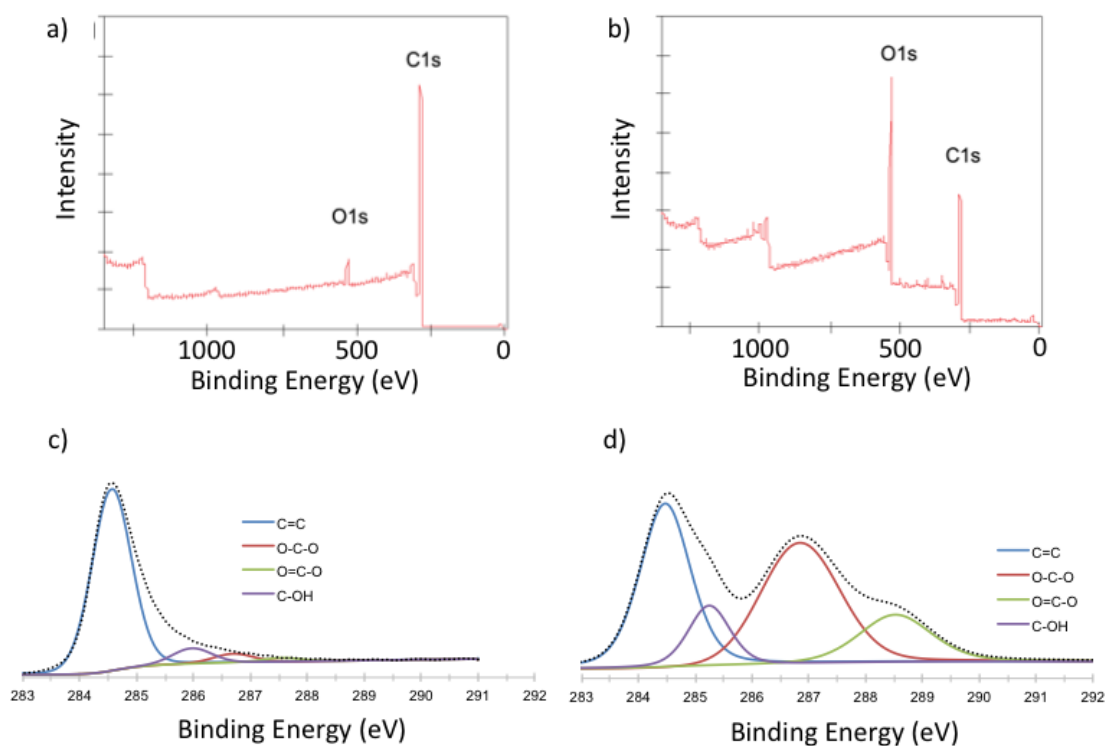

**Figure S7:** X-ray photoelectron spectra of LIG powders; (a, c) Before oxidation; (b, d) after oxidation.

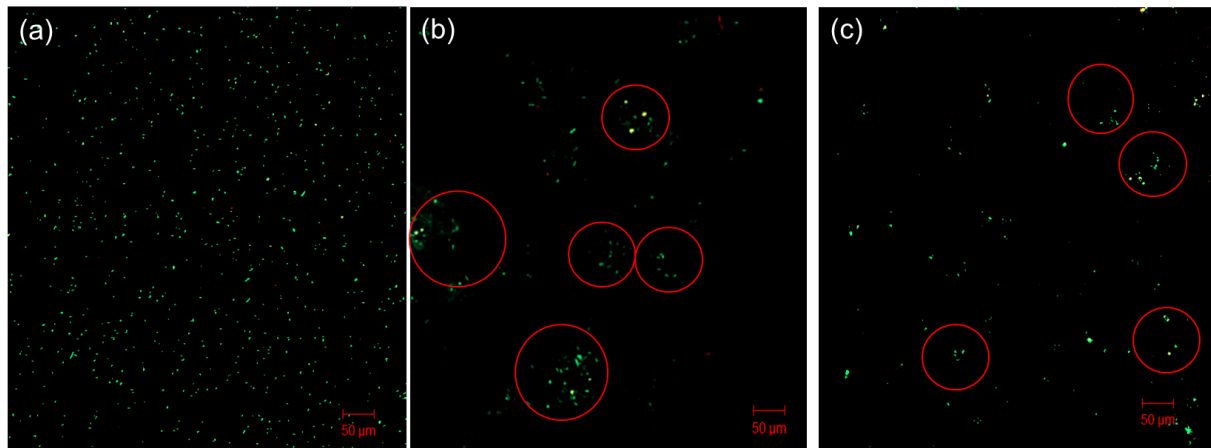

**Figure S8:** Representative epi-fluorescence picture of *Pseudomonas aeruginosa* in LIG suspension (Green: live cells, Red: dead cells); (a) Bacterial suspension with no LIG; (b) Bacterial suspension with P-LIG-B, red circles are showing LIG powder and bacterial cells aggregates; (c) Bacterial suspension with P-LIG-S.

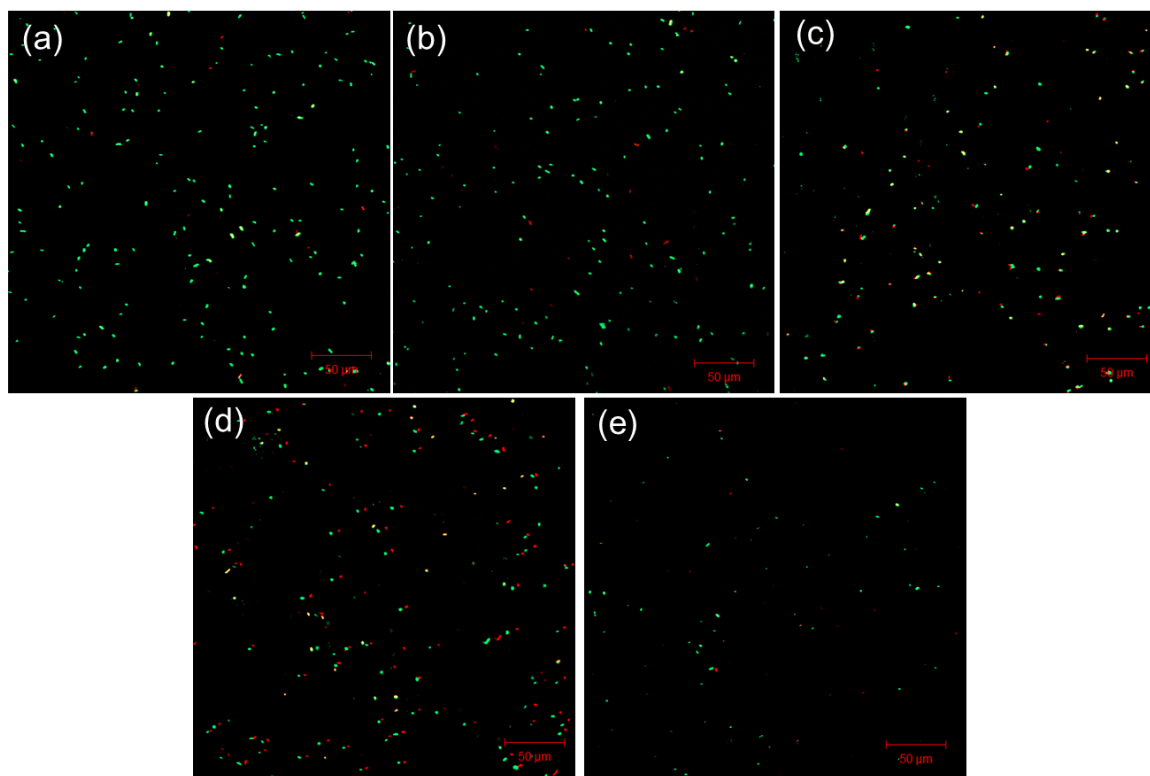

**Figure S9:** Representative epi-fluorescence picture of *Pseudomonas aeruginosa* on different surfaces (Green: live cells, Red: dead cells); (a) Cells on mixed cellulose filter; (b) Cells on mixed cellulose filter coated with P-LIG-B; (c) Cells on mixed cellulose filter coated with P-LIG-S; (d) Cells on mixed cellulose filter coated with P-LIG-SO; (e) Cells on 2% LIG film.

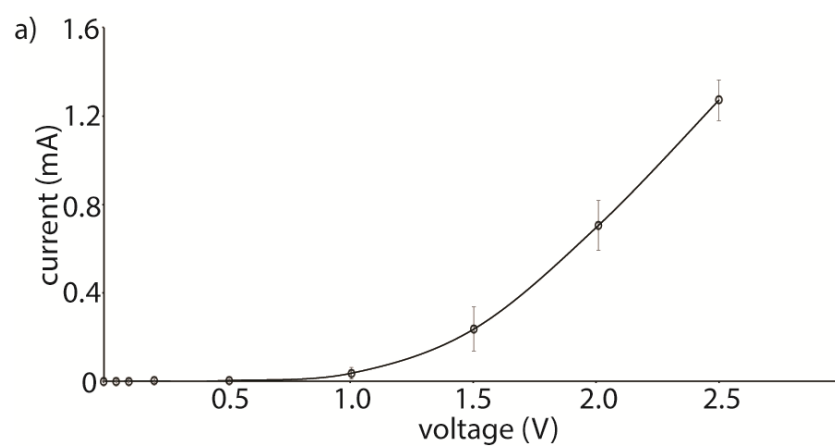

**Figure S10:** Current voltage relationship with the LIG electrodes in antibacterial batch experiments.

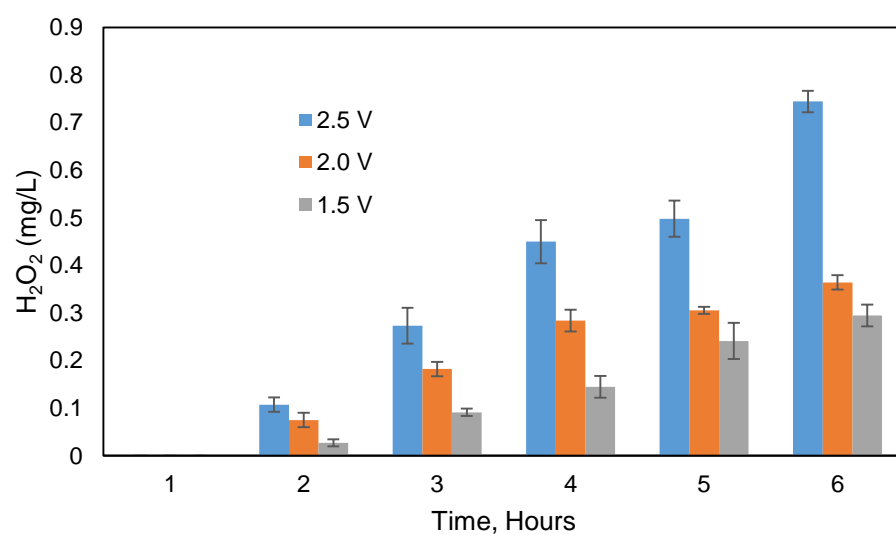

**Figure S11:** H<sub>2</sub>O<sub>2</sub> generation in bulk solution with low bacteria load.

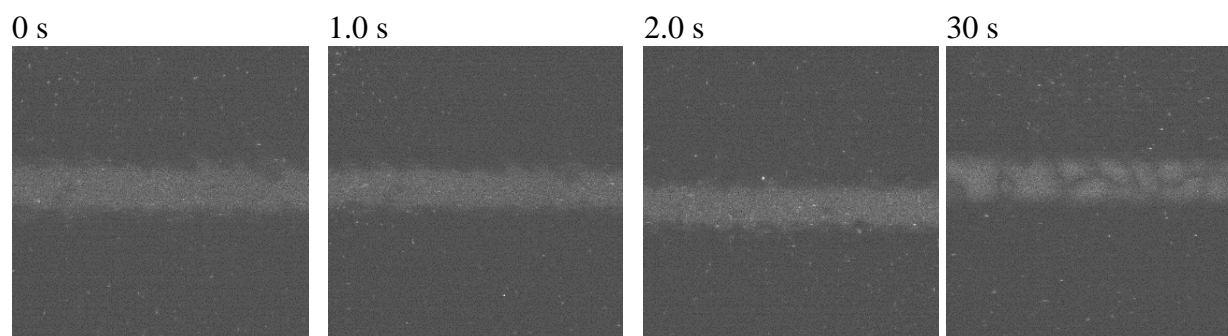

**Figure S12:** Real time bacterial population observation under epi-florescent microscopy at 1.1 V. In each image, a 100  $\mu\text{m}$  channel separates the anode (top), from the cathode (bottom).

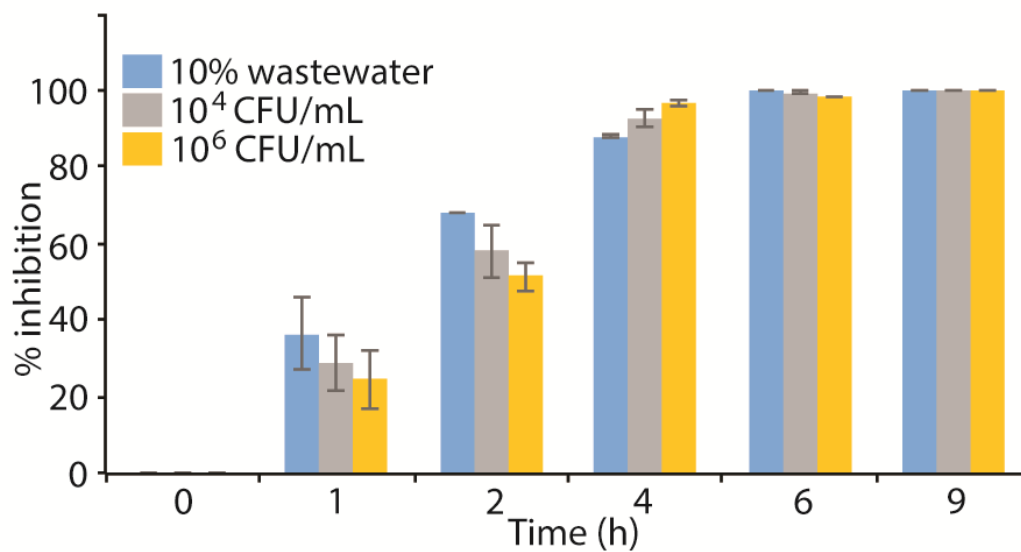

**Figure S13:** Inhibition of microbial growth expressed as % inhibition using various secondary treated wastewater solutions at 2.5 V.



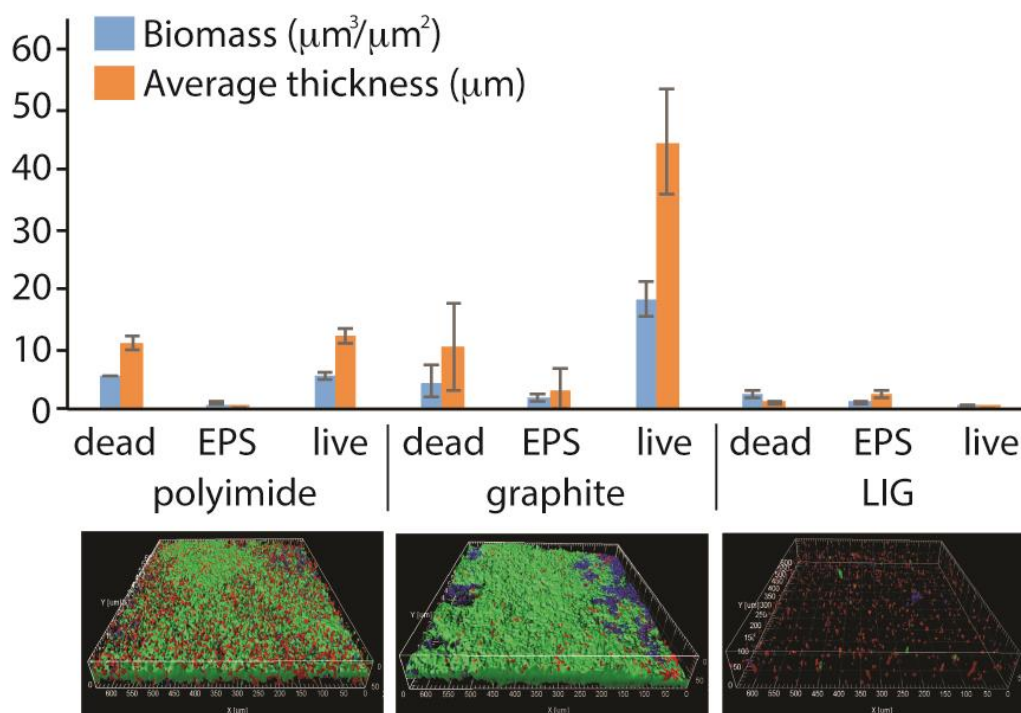

**Figure S14:** Biofilm growth on the polyimide, graphite, and LIG surfaces with using secondary treated wastewater showing biomass and average thickness. Representative IMARIS software images for polyimide; graphite; and LIG are seen. Green, red, and blue represents live bacteria, dead bacteria, and EPS, respectively.

**Table S1:**  $\text{H}_2\text{O}_2$  (1.0 mg/L) is added to a solution with low bacterial concentration, and the bacterial viability and the  $\text{H}_2\text{O}_2$  is monitored over time. The control is the solution with no  $\text{H}_2\text{O}_2$  added.

| Low Loading |                                              |                               |
|-------------|----------------------------------------------|-------------------------------|
| Time (h)    | Measured $\text{H}_2\text{O}_2$ Conc. (mg/L) | % Killing relative to control |
| 0           | 1.07                                         | 0.00                          |
| 1           | 0.92                                         | 6.26                          |
| 2           | 0.84                                         | 4.09                          |
| 4           | 0.75                                         | 0.77                          |
| 6           | 0.69                                         | 4.26                          |
| 9           | 0.49                                         | 4.63                          |

**Table S2:** H<sub>2</sub>O<sub>2</sub> (1.0 mg/L) is added to a solution with high bacterial concentration, and the bacterial viability and the H<sub>2</sub>O<sub>2</sub> is monitored over time. The control is the solution with no H<sub>2</sub>O<sub>2</sub> added.

| <b>High Loading</b> |                                                        |                                  |
|---------------------|--------------------------------------------------------|----------------------------------|
| <b>Time (h)</b>     | Measured H <sub>2</sub> O <sub>2</sub><br>Conc. (mg/L) | % Killing relative<br>to control |
| <b>0</b>            | 1.09                                                   | 0.00                             |
| <b>1</b>            | 0.26                                                   | 5.45                             |
| <b>2</b>            | 0.18                                                   | 4.56                             |
| <b>4</b>            | 0.13                                                   | 7.44                             |
| <b>6</b>            | 0.00                                                   | 4.12                             |
| <b>9</b>            | 0.00                                                   | 1.09                             |

**Table S3:** Change in current with voltage in microscope electrodes.

| <b>Microscope Electrodes</b> |                               |                                |
|------------------------------|-------------------------------|--------------------------------|
| <b>Voltage<br/>(V)</b>       | LIG Electrode<br>Current (μA) | Graphite Paper<br>Current (μA) |
| <b>0</b>                     | 0                             | 0                              |
| <b>0.1</b>                   | 3.2                           | 0.1                            |
| <b>0.5</b>                   | 28.5                          | 0.6                            |
| <b>1</b>                     | 67.2                          | 4.2                            |
| <b>1.5</b>                   | 105.6                         | 42.5                           |
| <b>2</b>                     | 152.3                         | 86.5                           |
| <b>2.5</b>                   | 203.8                         | 110.4                          |

**Table S4:** Secondary treated wastewater composition.

|                  | Value (ppm) |
|------------------|-------------|
| BOD <sub>5</sub> | 55          |
| TOC              | 122         |
| Nitrogen         | 20          |
| Phosphate        | 15          |
